# Supplementary material for: Association between Dysfunction of the Nucleolar Stress Response and Multidrug Resistance in Pediatric Acute Lymphoblastic Leukemia
Source: MDPI journal article supplement (doi:10.3390/cancers14205127), 2022-10-19
Supplement: s1 [file s1]

## Supplementary information

### **Association between dysfunction of the nucleolar stress response and multidrug resistance in pediatric acute lymphoblastic leukemia**

**Shunsuke Nakagawa<sup>1</sup>, Kohichi Kawahara<sup>2,\*</sup>, Yasuhiro Okamoto<sup>1,\*</sup>, Yuichi Kodama<sup>1</sup>, Takuro Nishikawa<sup>1</sup>, Yoshifumi Kawano<sup>1</sup>, and Tatsuhiko Furukawa<sup>2</sup>**

1. Department of Pediatrics, Graduate School of Medical and Dental Sciences, Kagoshima University, Kagoshima 890-8520, Japan
2. Department of Molecular Oncology, Graduate School of Medical and Dental Sciences, Kagoshima University, Kagoshima 890-8520, Japan

a

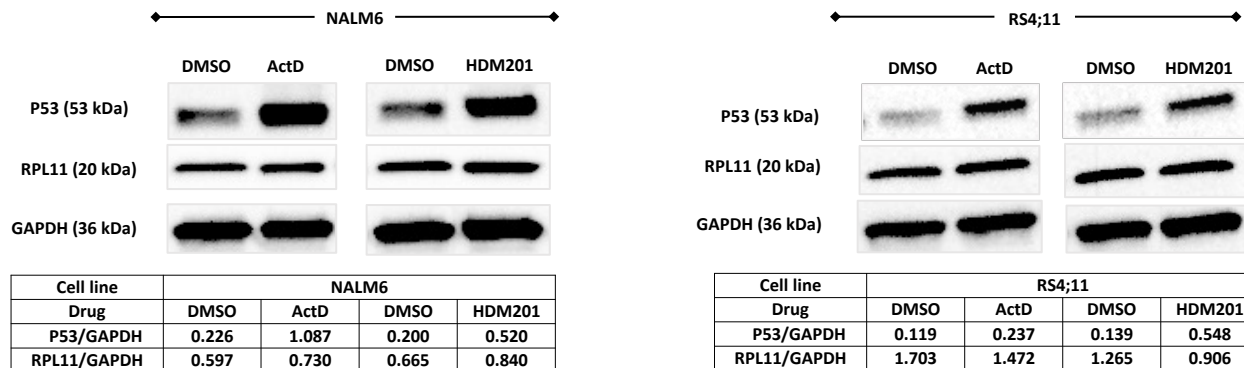

b

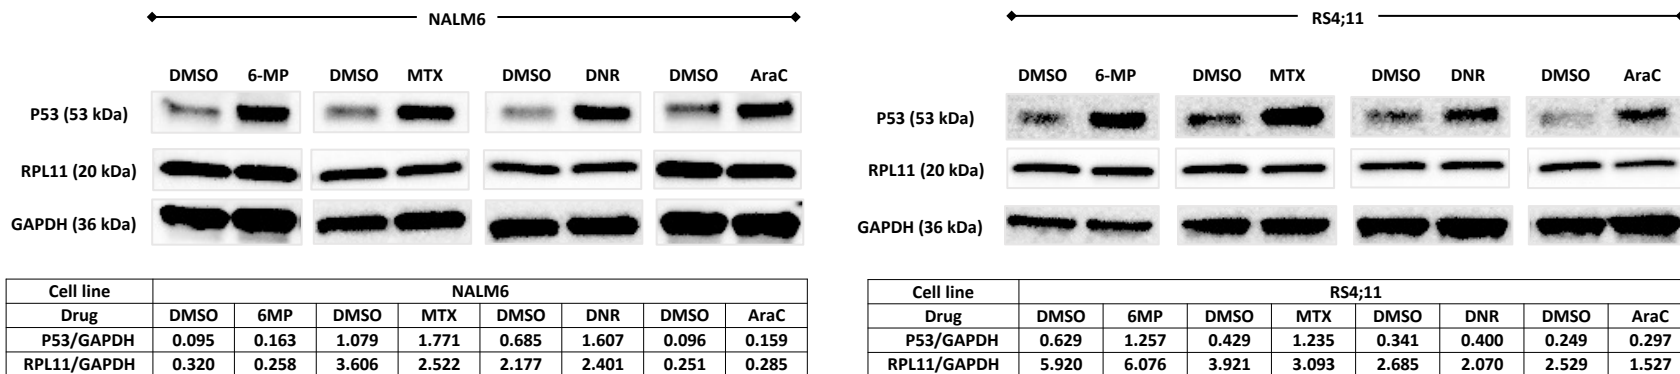

**Figure S1.** Actinomycin D, HDM201, 6-mercaptopurine, methotrexate, daunorubicin, and cytarabine increased TP53 protein expression. (a) Western blot analysis of TP53 and RPL11 at 24 h after 1 nM ActD or 100 nM HDM201 treatment in NALM6 cells as well as after 48 h of 0.1 nM ActD or 10 nM HDM201 treatment for RS4;11; (b) Western blot analysis of TP53 and RPL11 after 24 h of drug treatment in NALM6 cells and 48 h of drug treatment in RS4;11 cells. GAPDH levels were used as a loading control. Each cell was treated with 100  $\mu$ M 6-mercaptopurine, 100 nM methotrexate, 10 nM daunorubicin, and 100 nM cytarabine for NALM6 cells as well as with 10  $\mu$ M 6-mercaptopurine, 100 nM M methotrexate, 3 nM daunorubicin, and 3 nM cytarabine for RS4;11 cells. 6-MP, 6-mercaptopurine; ActD, actinomycin D; AraC, cytarabine; DMSO, dimethyl sulfoxide; DNR, daunorubicin; MTX, methotrexate.
